# Supplementary material for: A comparison of three thromboprophylaxis regimens in critically ill COVID-19 patients: An analysis of real-world data
Source: Frontiers journal article supplement (doi:10.3389/fcvm.2022.978420), 2022-08-16
Supplement: Data_Sheet_1.pdf [file Data_Sheet_1.pdf]

### Supplements Content

- Figure S1. A) Kaplan Meir curves for unadjusted composite of thrombotic events. B) Kaplan Meir curves for unadjusted overall in-hospital mortality. C) Safety outcome of unadjusted minor bleeding. D) Safety outcome of unadjusted major bleeding
- Table S1. Dose interaction with D-dimer

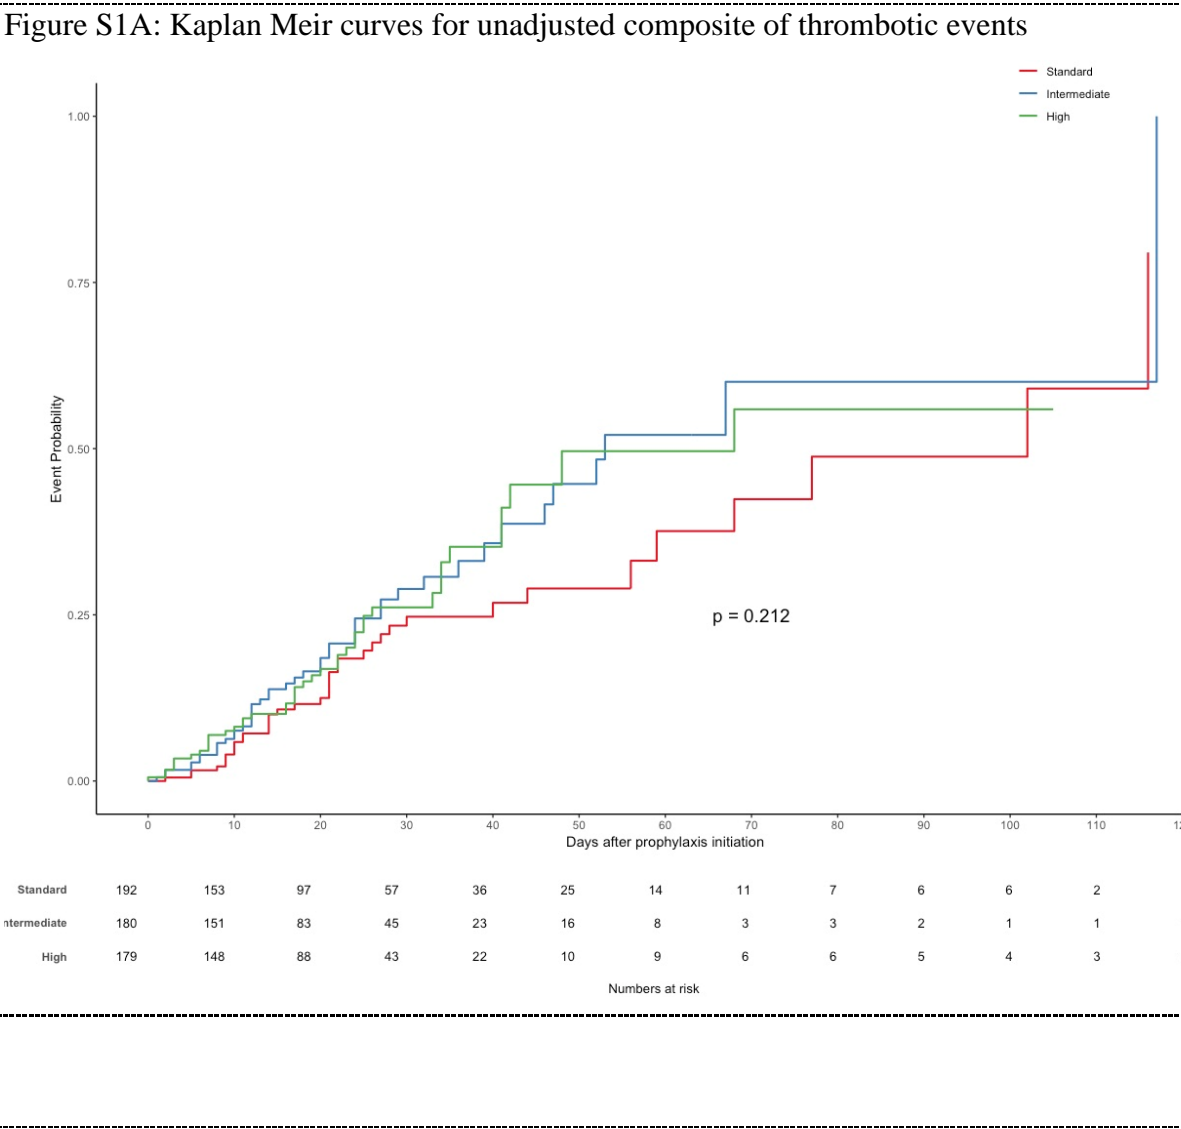

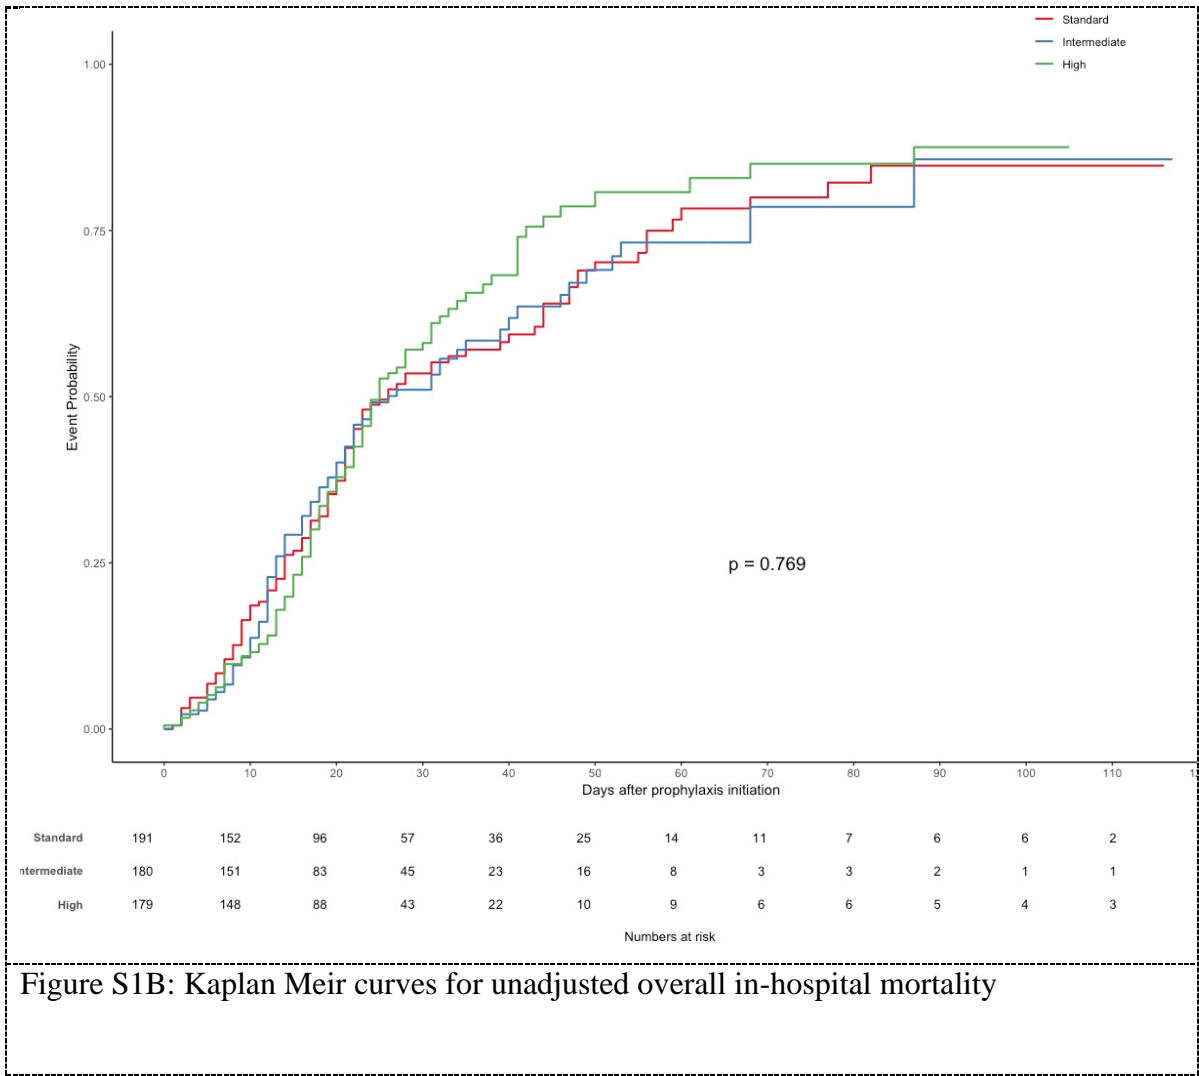

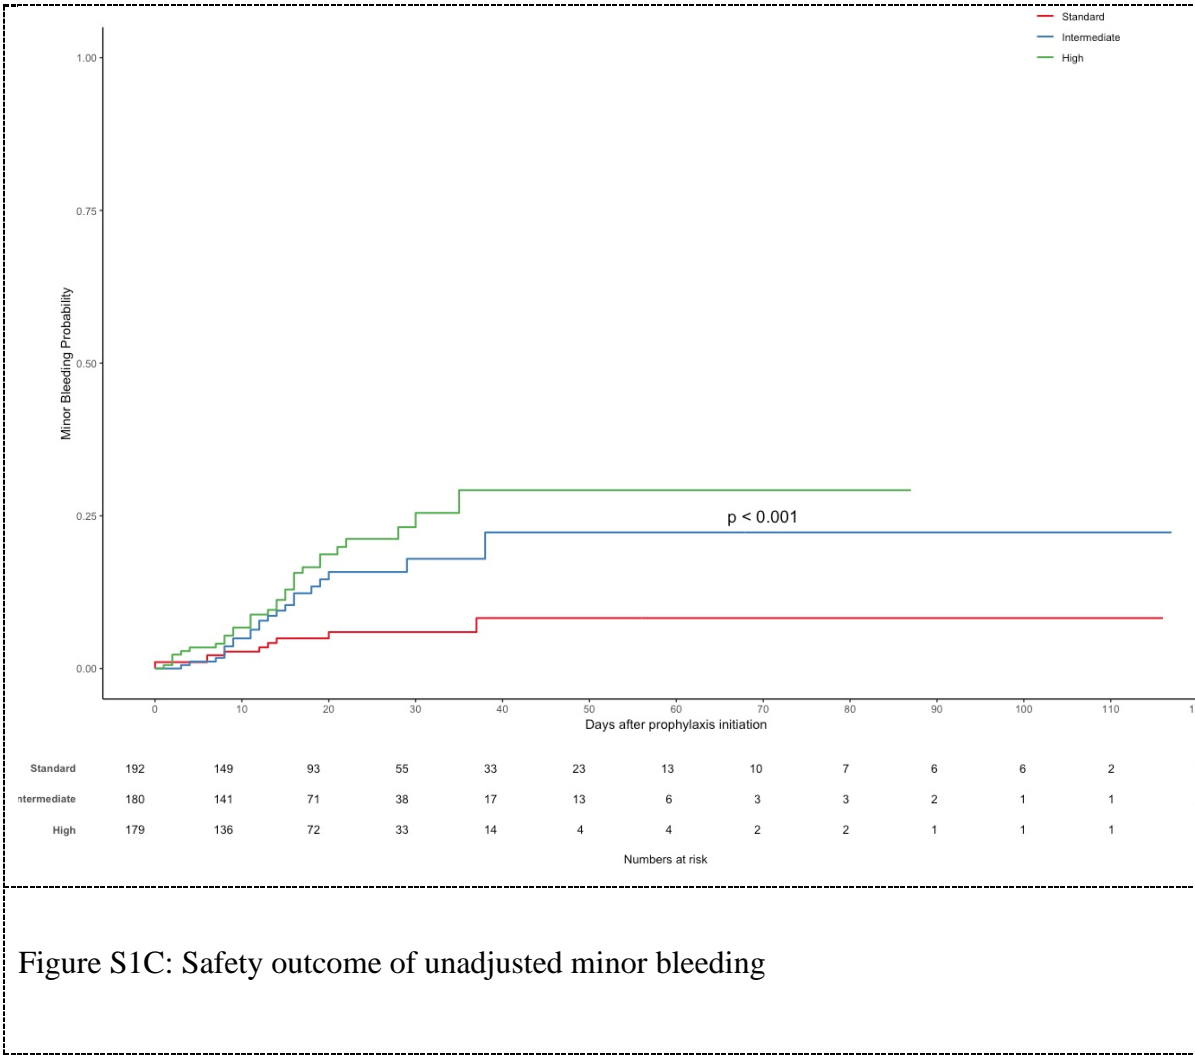

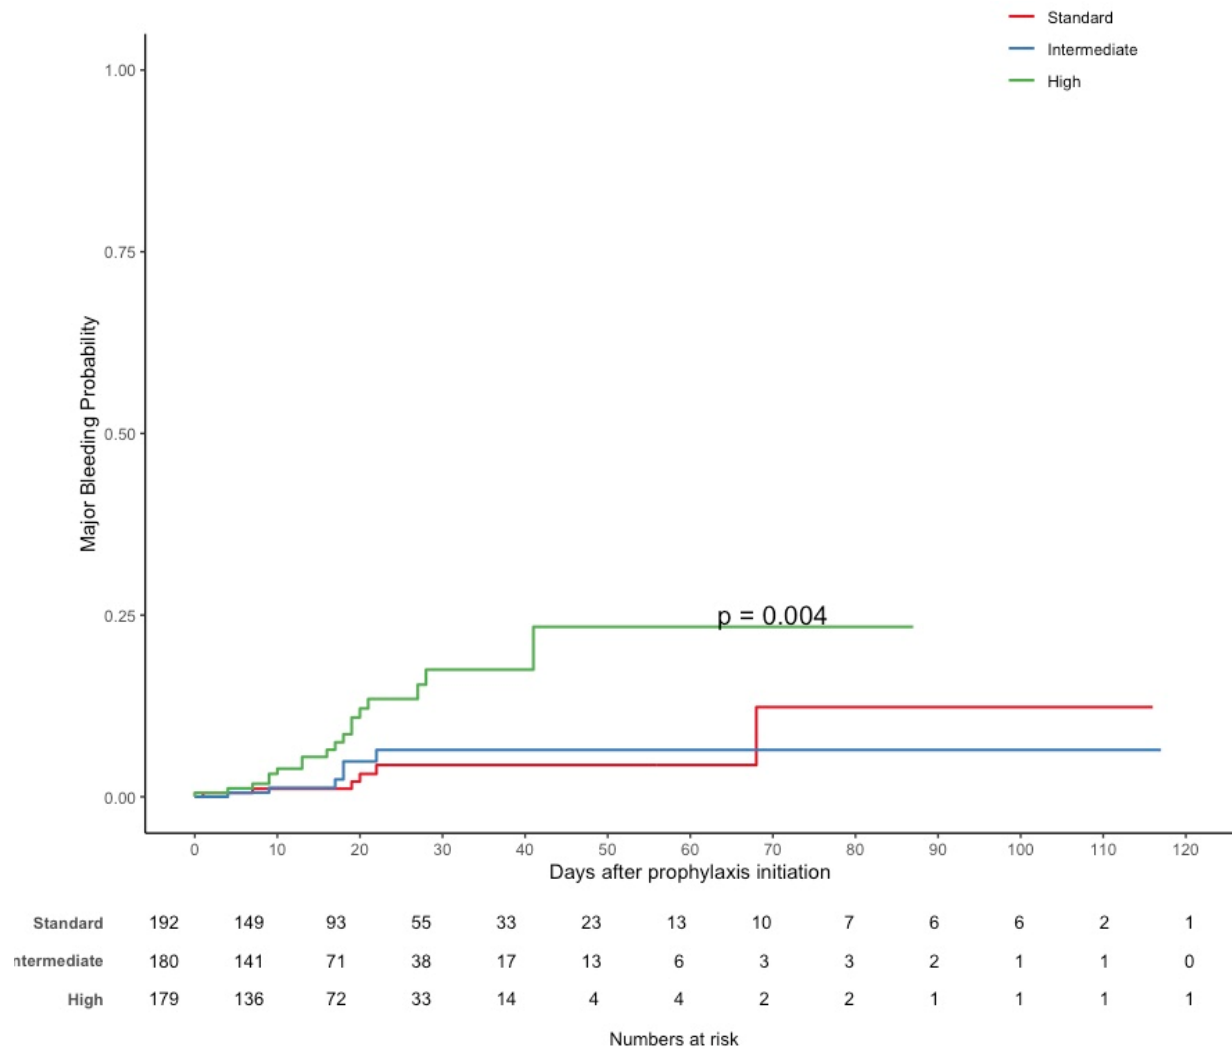

Figure S1D: Safety outcome of unadjusted major bleeding

| Table S1. Dose interaction with D-dimer        |                       |                           |                     |
|------------------------------------------------|-----------------------|---------------------------|---------------------|
| Variable                                       | Standard dose (n=102) | Intermediate dose (n=103) | High Dose (n=104)   |
| D-dimer ( $\mu\text{g /mL}$ )                  |                       |                           |                     |
| $\geq 1.5$ , n (%)                             | 63 (62.4)             | 65 (63.4)                 | 73 (70.0)           |
| Patients with composite primary outcome (n, %) | 12.1 (19.0)           | 15.6 (23.9)               | 22.0 (30.2)         |
| Odds ratios (95% CI)                           | Reference             | 1.19 (0.39 to 3.69)       | 1.93 (0.57 to 6.53) |
| CI: Confidence interval                        |                       |                           |                     |
